# Supplementary material for: Analysis of the effect of cations on protein conformational stability using solid-state nanopores
Source: Royal Society of Chemistry journal article supplement (doi:10.1039/d4an00248b), 2024-01-01
Supplement: d4an00248b1.pdf [file d4an00248b1.pdf]

## **Supporting Information**

### **Analysis for Effect of Cations on Protein Conformational Stability Using Solid-State Nanopores**

Libo Zhu<sup>1\*</sup>, Hongwen Wu<sup>2</sup>, Zhengyuan Xu<sup>1</sup>, Lanying Guo<sup>1</sup>, Jinsong Zhao<sup>1\*</sup>

1. School of Medical Imaging, Wannan Medical College, Wuhu, 241002, China.
2. Jiangxi Institute of Respiratory Disease, the First Affiliated Hospital, Jiangxi Medical College, Nanchang University, Nanchang, China.

S1

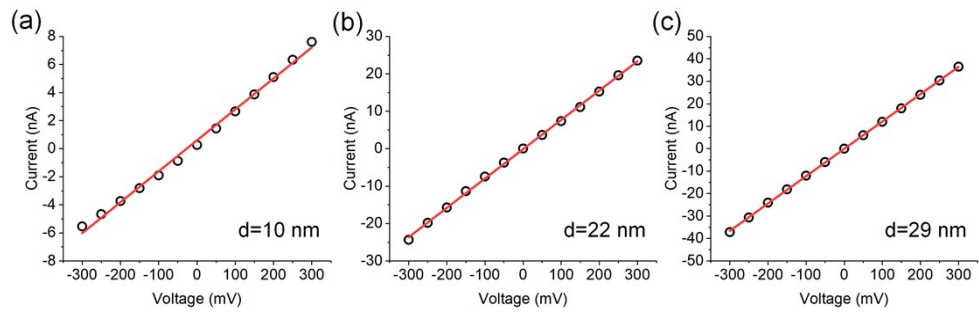

Fig. S1  $I-V$  curves for different diameter nanopores in 1 M NaCl.

S2

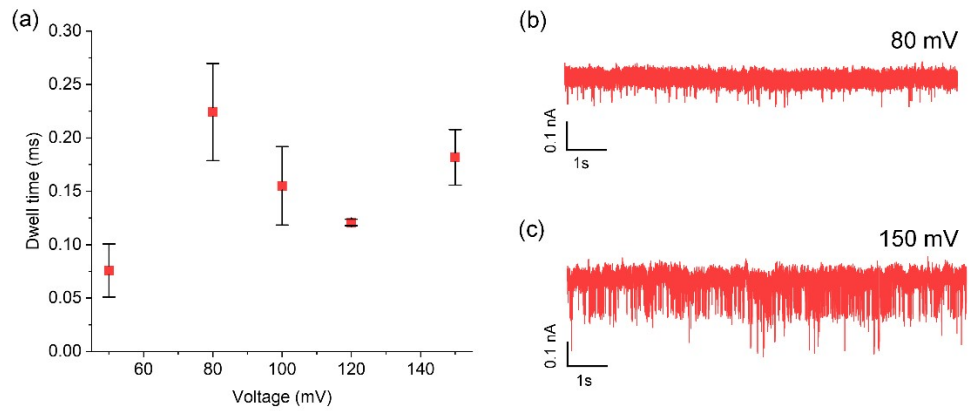

**Fig. S2** (a) Dependence of dwell time versus applied voltage for BSA translocating through a ~10 nm diameter nanopore in 1 M NaCl. Continuous current traces of BSA translocating through a ~10 nm diameter nanopore at 80 mV (b) and 150 mV (c).

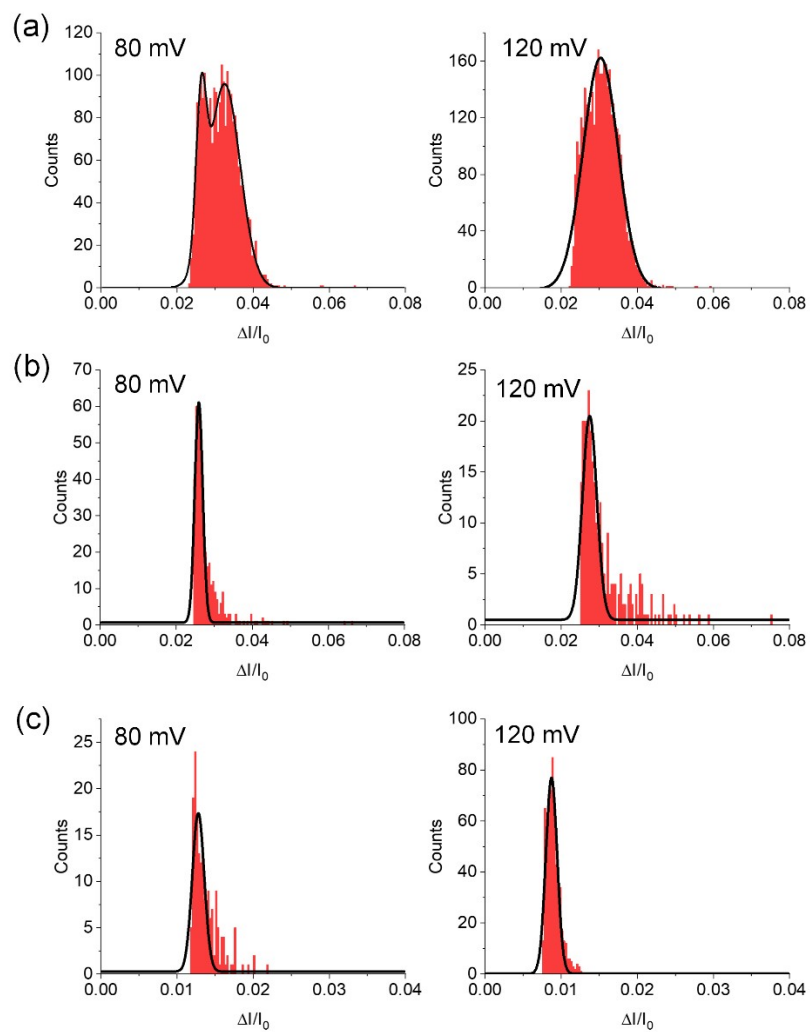

**Fig. S3** Histograms of fractional current blockade ( $\Delta I/I_0$ ) for BSA translocation events through a  $\sim 10$  nm (a),  $\sim 22$  nm (b) and (c)  $\sim 29$  nm nanopore at 80 mV and 120 mV.

S4

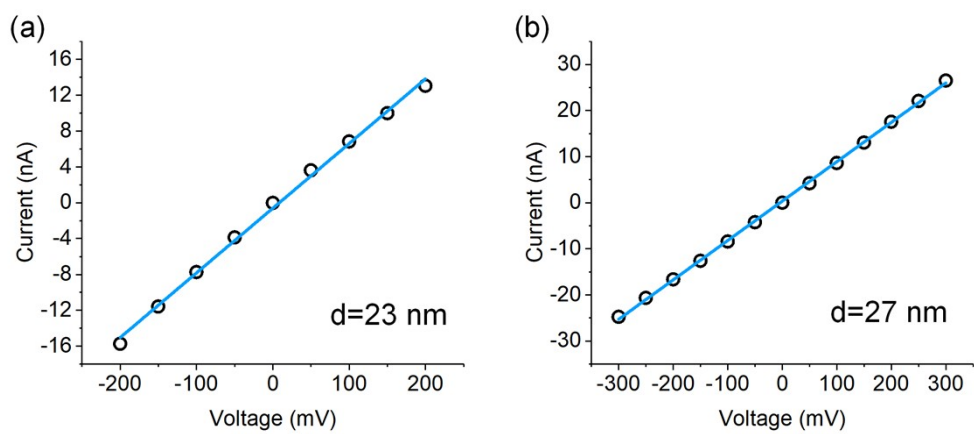

Fig. S4  $I$ - $V$  curves for different diameter nanopores in 1 M LiCl.

S5

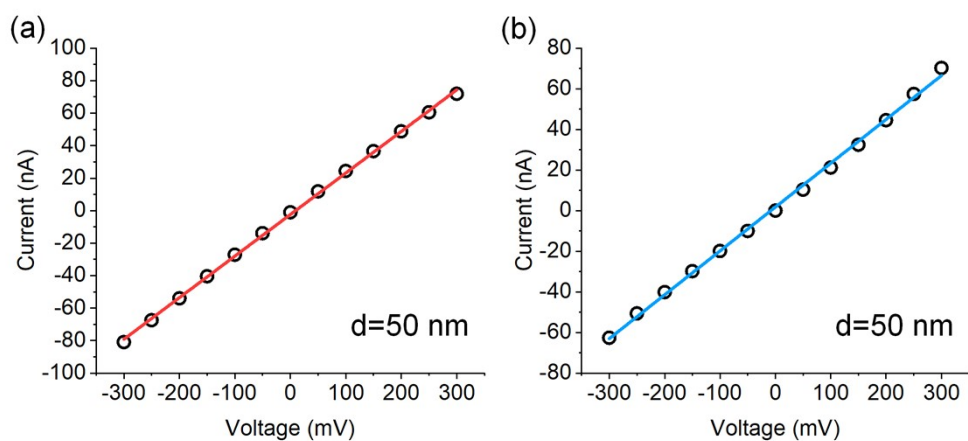

**Fig. S5** (a)  $I-V$  curve of a 50 nm diameter nanopore in 1 M NaCl. (b)  $I-V$  curve of a 50 nm diameter nanopore in 1 M LiCl.

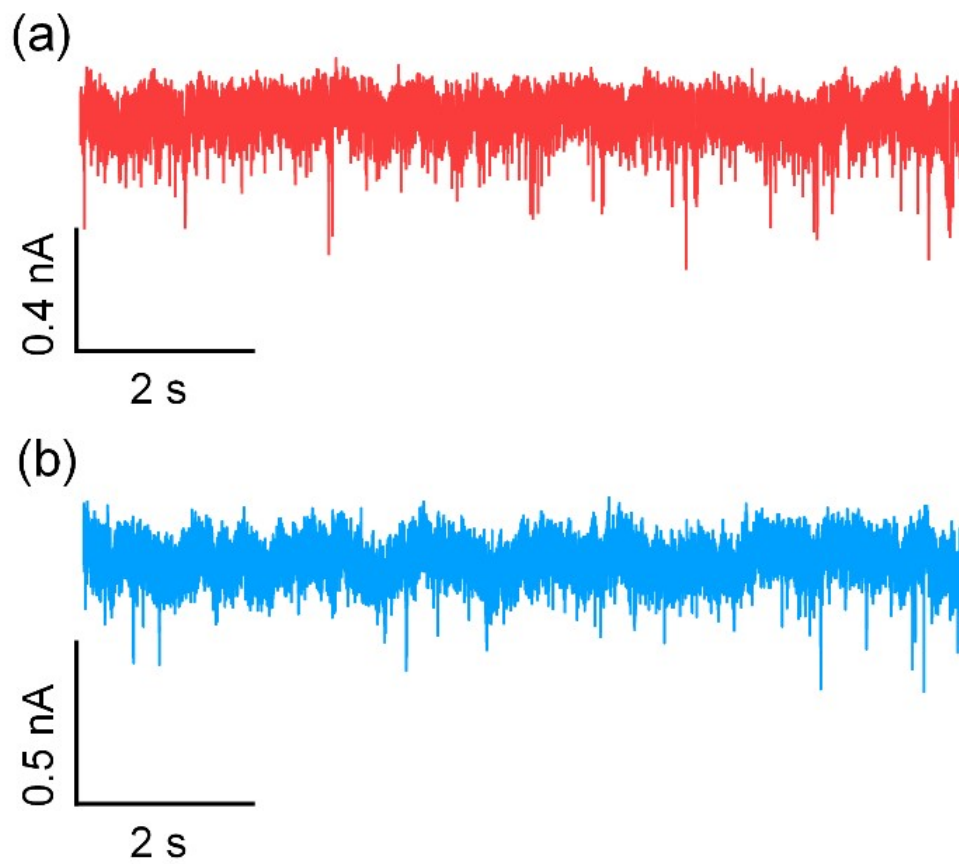

**Fig. S6** Continuous current traces of BSA translocating through a  $\sim 50$  nm diameter nanopore at 120 mV in 1 M NaCl (a) and 1 M LiCl (b).

S7

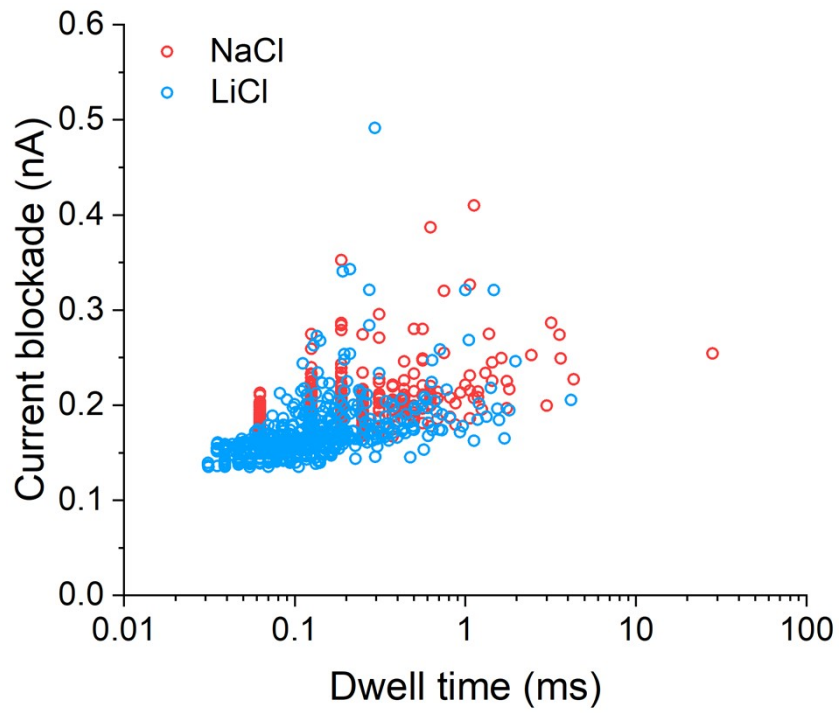

**Fig. S7** Current blockade ( $\Delta I$ ) vs dwell time scatter plots for BSA translocation events through a  $\sim 50$  nm diameter nanopore in different electrolytes.
